Kulshreshtha et al

---

1 **Simvastatin mediates inhibition of exosome synthesis, localization and secretion via**  
2 **multicomponent interventions.**

3 Ankur Kulshreshtha\*<sup>b</sup>, Swati Singh, Kritika Khanna, Anurag Agrawal, and Balaram Ghosh\*<sup>a</sup>

4 <sup>a</sup> Molecular Immunogenetics Laboratory and Centre of Excellence for Translational Research in  
5 Asthma & Lung disease, CSIR-Institute of Genomics and Integrative Biology, Mall Road, Delhi  
6 110007, India.

7 <sup>b</sup> Molecular medicine group, International Center for Genetic Engineering and Biotechnology  
8 Aruna Asaf Ali Marg, Delhi 110 067, India

9

10 **\*To whom all correspondence should be addressed:**

11 **Balaram Ghosh**

12 Molecular Immunogenetics Laboratory, CSIR-Institute of Genomics and Integrative Biology

13 Mall Road, Delhi 110007, India

14 Tel: 91-11-2766-2580

15 Fax: 91-11-2766-7471

16 E-mail: [bghosh@igib.res.in](mailto:bghosh@igib.res.in)

17

18 **Ankur Kulshreshtha**

19 Molecular medicine group, International Center for Genetic Engineering and

20 Biotechnology

21 Aruna Asaf Ali Marg, Delhi 110 067, India

Kulshreshtha et al

---

22 Tel: 91-11-2674-1317

23 Fax: 91-11- 2674-2316

24 E-mail: [ankurk.icgeb@gmail.com](mailto:ankurk.icgeb@gmail.com)

25

26 **Abstract**

27 Discovery of exosomes as modulator of cellular communication has added a new dimension to  
28 our understanding of biological processes. Exosomes influence the biological systems by  
29 mediating trans-communication across tissues and cells, which has important implication for  
30 health and disease. Identification of strategies for exosome modulation may pave the way  
31 towards better understanding of exosome biology and development of novel therapeutics. In  
32 absence of well-characterized modulators of exosome biogenesis, an alternative option is to  
33 target pathways generating important exosomal components. Cholesterol represents one such  
34 essential component required for exosomal biogenesis. We initiated this study to test the  
35 hypothesis that owing to its cholesterol lowering effect, simvastatin, a HMG CoA inhibitor,  
36 might be able to alter exosome formation and secretion. Using previously established protocols  
37 for detecting secreted exosomes in biological fluids, simvastatin was tested for its effect on  
38 exosome secretion under various in-vitro and in-vivo settings. Murine model of AAI was used  
39 for further validation of our findings. Utilizing aforementioned systems, we demonstrate  
40 exosome-lowering potential of simvastatin in various in-vivo and in-vitro models, of AAI and  
41 atherosclerosis. We believe that the knowledge acquired in this study holds potential for  
42 extension to other exosome dominated pathologies and model systems.

43

## 44 **Introduction**

45 Exosomes are cell secreted membrane bound nano-vesicular structures that have been shown to  
46 modulates the function and phenotype of recipient cells, <sup>1</sup> via transfer of associated lipids,  
47 proteins, RNA, and DNA species. <sup>2,3</sup> Such contents vary with cell lineage and state, accounting  
48 for a wide range of reported effects. <sup>4</sup> For example, stem cell exosomes render protective effects,  
49 while <sup>5</sup> cancer cell derived exosomes promote metastasis. <sup>6,7</sup> Pro-inflammatory role for exosomes  
50 has also been demonstrated in other pathological conditions. <sup>8-10</sup> some studies have even  
51 proposed that strategies to reduce exosome secretion might have protective effects during  
52 inflammatory conditions. <sup>11,12</sup>

53 Formation and secretion of exosomes is a complex biological process, detailed  
54 knowledge of which remains incomplete. Though recent studies have started identifying key  
55 proteins involved in this process, such as PI3K, Akt, eNOS, Alix, syndecan, syntenin, Rab-27a  
56 and Rab-27b, <sup>12-14</sup> their precise role in this complex process is still under investigation. Other  
57 than proteins, ceramide and calcium have also been reported to regulate exosome biogenesis and  
58 secretion respectively. <sup>15,16</sup> Despite rapidly emerging evidence for associative role of exosomal  
59 communication in inflammatory diseases, there has been little progress towards identification of  
60 drug-candidates that can inhibit exosome secretion. While experimental studies have used  
61 siRNAs against important proteins <sup>12</sup> and pharmacological inhibitors such as GW4869 <sup>16</sup>, they  
62 still await approval for human use. Towards filling this lacuna, we reasoned if inhibition of  
63 cholesterol synthesis by statins could be a viable strategy for inhibiting exosome secretion, as  
64 cholesterol is most abundant component of exosomal membrane and statins represent safe and  
65 approved class of drugs for limiting cholesterol availability. This approach seemed plausible for  
66 three reasons: a) cholesterol is a necessary lipid precursor for formation of exosomal membranes,

67 and could offer a better target than proteins such as various Rab family proteins, whose  
68 exosome-independent functionality has not been explored yet, b) although statins are mainly  
69 employed for cholesterol biosynthesis inhibition, they also have a number of poorly understood  
70 additional anti-inflammatory effects<sup>17</sup> and, c) repurposing of an existing drug for exosome  
71 reduction would be far more fast and efficient toward clinical application than discovering novel  
72 drug candidates.

73 Here, we investigated if simvastatin could reduce formation and/ or secretion of  
74 exosomes, and whether this could offer protection against exosome mediated pro-inflammatory  
75 response in experimental models of asthma and in-vitro model of atherosclerosis. Our current  
76 data supports a novel mode of action for simvastatin in inhibiting both exosome formation and  
77 secretion that explains some poorly understood aspects of anti-inflammatory effects of statins  
78 and can be further utilized in several exosome-mediated inflammatory conditions.

79

## 80 **RESULTS**

### 81 **Simvastatin reduces exosome secretion *in vitro*:**

82 Important role for cholesterol in formation of exosomes has been previously reported,<sup>16</sup> so we  
83 reasoned if limiting cholesterol availability in target cells could hinder exosome production.  
84 Literary evidences wherein cholesterol reduction has been shown to impair exocytosis of  
85 synaptic vesicles support this hypothesis.<sup>18</sup> To further test this hypothesis, we treated exosome-  
86 secreting cells with simvastatin, and measured effect on exosome secretion using a semi-  
87 quantitative fluorescent bead-based assay<sup>10</sup> and for exosome associated proteins using western-  
88 blotting. We also validated the reduction in cholesterol levels upon simvastatin treatment

89 **(Figure S1 in the online supplement)**. Characterization of these particles as exosomes using  
90 EM, western blotting, DLS and density gradient centrifugation has already been described in an  
91 earlier report from our group, but we still validated the size and morphology using TEM **(Figure**  
92 **S2 in the online supplement)**.<sup>10</sup> Epithelial cells and monocytes treated with increasing  
93 concentration of simvastatin for a period of 24 hours exhibited a significant reduction in the level  
94 of secreted exosomes, as measured by the bead-based assay **A-B)**. A significant reduction of  
95 about 40% was noted at the 0.3  $\mu$ M dose of simvastatin, which corresponds to non-toxic  
96 maximal plasma concentration associated with simvastatin therapy in humans,<sup>19</sup> confirming the  
97 plausibility of this effect at usual clinical dosing. The lack of toxicity was also confirmed by  
98 MTT staining (data not shown) and visible inspection **(Figure S3 in the online supplement)**.  
99 The efficacy of bead-based assay was validated by confirming linearly increased detection of  
100 exosome-associated proteins, such as CD9/CD81 and Annexin-V, in cell-culture supernatants  
101 from increasing number of cells **(Figure S4 in the online supplement)**. These effects were  
102 confirmed further by measuring exosome-associated proteins, Alix, Tsg-101 and  $\beta$ -actin in  
103 pelleted exosome fraction of culture supernatant from lowest effective dose (0.3  $\mu$ M) of  
104 simvastatin **(Figure 1C)**.

105 In an earlier study, we had demonstrated that IL-13 treatment led to increased production of pro-  
106 inflammatory exosomes from airway epithelial cells.<sup>10</sup> We tested if simvastatin treatment could  
107 reverse this process as well, and observed that simvastatin treatment significantly reduced the  
108 levels of secreted exosomes from IL-13 treated epithelial cells **(Figure 1D)**, as measured by  
109 bead-based assay mentioned above. This corroborates well with previous observations wherein  
110 simvastatin has been shown to play a beneficial role in asthma<sup>20,21</sup> and we propose that

Kulshreshtha et al

---

111 inhibition of proinflammatory exosomes could be one of the mechanisms behind simvastatin's  
112 protective effects.

113

#### 114 **Simvastatin reduces the intracellular levels of exosome-associated proteins**

115 Our initial data suggested that simvastatin treatment led to reduction in exosome secretion,  
116 possibly by conventional action of cholesterol reduction by statin (**Figure S1 in the online**  
117 **supplement**), but the detailed mechanism behind it remain unclear. Few reports have identified  
118 eNOS and Alix axis in exosome biogenesis wherein Alix has been shown to positively regulate  
119 the exosome secretory process<sup>12,13</sup> and a negative regulatory role for eNOS.<sup>12</sup> We had  
120 previously demonstrated that simvastatin increases eNOS levels, both in cultured airway  
121 epithelial cells, as well as *in vivo*,<sup>22</sup> we further sought to determine if it was also affecting ALIX  
122 levels. We observed that simvastatin, but not another exosome inhibitor (GW4869), reduce the  
123 levels of Alix and CD-63 (**Figure 2A**). Surface levels of important exosome associated proteins  
124 CD63 and CD81 but not E-cadherin, were also dose-dependently reduced by simvastatin (**Figure**  
125 **2B**), confirming the specificity and general reduction in these proteins by simvastatin treatment.  
126 The reduction in exosome-associated proteins like CD63 was additionally confirmed by  
127 immunofluorescence microscopy (**Figure 2C**). Thus, reduction in levels of exosome  
128 synthesizing proteins may partly contribute to the simvastatin-mediated reduction in exosome  
129 secretion.

130

131

132 **The effect of simvastatin on exosome production and inflammation is only partially related**  
133 **to cholesterol reduction:**

134 We (and others) have previously reported elevated levels of pro-inflammatory exosomes in  
135 asthmatic lung as well as in BALF from mice of experimental model of allergic airway  
136 inflammation (AAI). Pharmacological inhibition of these exosomes was found to provide  
137 protective effect in experimental asthma.<sup>10</sup> To determine whether simvastatin treatment would  
138 inhibit exosome secretion and in turn attenuate AAI, we used a well-established mouse model of  
139 AAI (**Figure S5 in the online supplement**). Further, to determine whether the effect of  
140 simvastatin was due to inhibition of the mevalonate formation step of cholesterol biosynthesis, or  
141 an independent pleiotropic effect, we additionally administered excess mevalonic acid<sup>23</sup> to a  
142 group of simvastatin-treated mice with AAI. Increased exosome content in BAL fluid in AAI  
143 was fully reversed by simvastatin treatment (**Figure 3A**). However, a large residual effect of  
144 simvastatin was seen even after mevalonate supplementation. This reduction in exosome content  
145 was found to be associated with protective effect on other asthmatic features as well, such as  
146 inflammation, mucin granule production, AHR, cell-count and serum IgE (**Figure 3B-G**). Also,  
147 in ova-challenged mice, simvastatin significantly decreased the levels of IL-4, IL-13 (**Figure**  
148 **3H**), IL-5 and IL-10 (**Figure S6, A-B in the online supplement**). Mevalonate co-treatment,  
149 however, did not reverse the inhibitory effect of simvastatin on these cytokines. Levels of IFN- $\gamma$ ,  
150 an important Th1 cytokine, was unperturbed by any of the treatments (**Figure S6, C in the**  
151 **online supplement**). Thus the effect of simvastatin on exosomes and AAI in mouse model could  
152 only be partly explained by reduced cholesterol synthesis and may relate to other pleiotropic  
153 effects as suggested previously. As animal models are complex systems, often involving  
154 interaction of several components leading to less clean readouts, we further validated the

155 exosome inhibitory potential of simvastatin in a simpler in-vitro interaction system mimicking  
156 pro-atherogenic exosomal interaction between monocytes and endothelial cells.

157

158 **Simvastatin mediated reduction in monocytic exosomes renders a protective effect in an *in***  
159 ***vitro* model of atherosclerosis**

160 Atherosclerotic plaque formation is a process whereby deposition of excess lipid and cholesterol  
161 in coronary artery leads to narrowing of blood vessels, thereby causing a reduction in blood flow  
162 to heart, resulting in heart failure. Atherosclerotic lesions are usually characterized by increased  
163 endothelial migration. In a study exploring this phenomenon,<sup>24</sup> authors implicated the role of  
164 exosomes (referred to as microvesicles in this paper) secreted by plaque-associated monocytes in  
165 endothelial migration. Microvesicle (MV) associated mir-150 was identified as the key driver of  
166 this process.<sup>24</sup> Since simvastatin has long been prescribed to patients of cardiovascular  
167 disorders, we wondered if one of the mechanisms by which it renders its protective effects could  
168 be by inhibiting microvesicle secretion from accumulated monocytes at plaque surface. For  
169 testing this hypothesis, we adopted the model previously described,<sup>24</sup> wherein monocytic  
170 microvesicles were shown to promote endothelial migration, and in turn atherosclerosis. These  
171 microvesicles contained several micro-RNA species including mir-150, mir-16 and mir-181a,  
172 however the pro-atherogenic nature of these vesicles was attributed majorly to mir-150, which  
173 caused reduction of c-myb in nearby endothelial cells, hence promoting their migration from the  
174 site of plaque formation.

175 Simvastatin treatment of monocytic cell line, THP-1, led to reduction in exosome secretion  
176 (**Figure 1C**), and a consequent reduction in the levels of secreted mir-150 (**Figure 4A**). mir-16



Kulshreshtha et al

---

177 and mir-181b were used as positive controls for exosomes-associated micro-RNA content.  
178 Simvastatin treatment however did not significantly alter the intracellular levels of any of these  
179 miRNAs (**Figure 4B**). Incubation of THP-1 derived DIO labeled MVs with HUVECs led to  
180 rapid uptake of these vesicles by HUVECs (**Figure 4C**), resulting in increased levels of mir-150  
181 (**Figure 4D**). Treatment of monocytes with simvastatin led to reduction in number of secreted  
182 microvesicles, and hence reduction in microvesicle-acquired mir-150 in HUVECs. mir-150 has  
183 been demonstrated to promote endothelial migration<sup>24</sup> and we also observed similar  
184 phenomenon in HUVECs treated with THP-1 derived microvesicle, in presence or absence of  
185 serum as a chemoattractant (**Figure 4E and Figure S7 in the online supplement**). Treatment of  
186 THP-1 with simvastatin before MV isolation significantly reduced migration of HUVECs,  
187 exhibiting an atheroprotective phenotype (**Figure 4E2**). Our results thus suggest that inhibition  
188 of monytic exosomes could be one of the alternate mechanism by which simvastatin renders a  
189 protective role in atherosclerosis.

190 Once the exosome inhibitory role of simvastatin was established using various model systems,  
191 we furthered our study to investigate the putative underlying molecular mechanism.

192

193 **Simvastatin treatment alters MVB trafficking and results in their accumulation near the**  
194 **plasma membrane.**

195 We found notable reduction in cellular CD-63 levels upon simvastatin treatment in *in vitro*  
196 systems (**Figure 2C**), that led us to test if this observation extends to *in vivo* conditions as well.  
197 For this purpose, lung tissue sections from our mouse model of AAI were stained for CD-63.  
198 Under these conditions, lungs are known to have elevated exosome-associated proteins in

199 epithelial cells and macrophages.<sup>10</sup> While inspecting lung-tissue sections of simvastatin treated  
200 mice, we observed an interesting phenomenon, wherein simvastatin treatment led to  
201 accumulation of CD-63 positive compartments near the plasma membrane in epithelial cells  
202 **(Figure 5A)** as well as in macrophages **(Figure 5B)**.

203 Since we observed an accumulation of CD63 positive compartments near the plasma membrane,  
204 we sought to investigate the fate of these compartments by using TIRF microscopy of CD63-  
205 EGFP transfected cells. While we found uniform distribution of MVBs and normal movement  
206 pattern in control cells, simvastatin treated cells had accumulation of MVBs near plasma  
207 membrane and restricted movement of other CD63 positive compartments, mostly towards the  
208 center of the cell **(Figure 5C, movie 1 and movie 2 in the online supplement)**.

209 Interestingly, while analyzing the TIRF data we found several CD63 positive compartments  
210 aligning with each other in a beeline pattern during their movement, suggesting them to be  
211 associated with well-defined cytoskeletal structures. These trails were shortened in simvastatin  
212 treated cells but had higher fluorescent intensity **(inset Figure 5D1-D2 and Figure 5D3)**.

213 Actins tracks have recently been implicated in movement of Rab11 and CCL2 containing  
214 vesicles, which initiate actin nucleation and elongation for their movement in a directed fashion.

215 <sup>25</sup> We observed association of the CD63 positive compartments with actin nucleation sites  
216 **(Figure 5E)**. In light of these observations, we speculated that these CD-63 containing MVBs  
217 might be utilizing actin machinery for their movement. Closer examination of CD63 and actin  
218 inside cells revealed that the CD63 positive signals were indeed lying along the actin filaments  
219 and enhancing polymerization of actin structures by Jasplakinolide led to accumulation of CD-63  
220 positive vesicles **(Figure 5F)**. Thus, we discovered that CD63 containing MVBs travel on actin

221 tracks. Future strategies targeting this pathway could provide further insight into exosome  
222 biology.

223

## 224 **DISCUSSION**

225 Exosomes have recently come forth as important mediator of cellular communication governing  
226 progression of various inflammatory disorders, and their increasing relevance to human  
227 pathologies command better tools for understanding their biology as well as for therapeutic  
228 purposes. Here, we provide first evidence that cholesterol lowering drug simvastatin could  
229 inhibit exosome synthesis and trafficking. Our results also suggest that some well-known anti-  
230 inflammatory and atherosclerosis preventive effects of statins may be linked to inhibition of  
231 exosome secretion.

232 We had previously reported that exosomes actively play a proinflammatory role in asthma  
233 pathogenesis and speculated that molecules capable of reducing exosome secretion might play a  
234 protective role in asthma.<sup>10</sup> In this study, we report that simvastatin mediated exosome reduction  
235 indeed result in protective phenotype in murine model of asthmatic airway inflammation, which  
236 is also supported by recent reports of beneficial role of statins in human subjects<sup>26</sup> and other  
237 experimental studies that focused on nitric oxide metabolism.<sup>22</sup> However, such *in vivo* models  
238 are complex and it is difficult to know whether the reduction in exosome secretion led to  
239 reduction in inflammation or *vice versa*. In support of an exosome-mediated effect, we found that  
240 the culture supernatant from simvastatin treated monocytes was diminished in exosomes and pro-  
241 inflammatory exosomal miRNA content, and also lacked the ability to induce endothelial  
242 migration.

243 While we found a number of interesting leads, the mechanisms by which statins potentially  
244 inhibit exosome secretion is not completely clear. Our finding that simvastatin regulated multiple  
245 proteins of exosome production machinery suggests the existence of a dedicated inter-connected  
246 protein network for exosomal production, managed by few key master regulators. While we  
247 started the study in the belief that inhibiting cholesterol synthesis may attenuate exosomal  
248 membrane formation, this seems too simplistic. Mevalonate supplementation was unable to  
249 restore exosome secretion in mouse lungs (**Figure 4A**). Clearly, these data do not exclude the  
250 possibility that simvastatin may exert other functional effects through alternative pathways as  
251 well. We also understand that full potential of such discoveries can be exploited only in  
252 conjunction with development of tools for their selective targeting as well.

253 Our finding that exosome containing MVBs may travel on actin networks and simvastatin  
254 treatment significantly alters the length of these linear structures and their membrane association  
255 together offers exciting new directions and tool to look for novel proteins regulating exosomes  
256 via altering MVB movements.

257 In summary, this study identifies simvastatin as a potential tool to target pathway of exosomes,  
258 and significantly extends the role of simvastatin than just being a cholesterol lowering drug to a  
259 potential adjuvant for exosome dominated pathologies.

260

261

262

263

264 **MATERIALS AND METHODS**

265 **Cell Lines**

266 Bronchial Epithelial cell line BEAS-2B and human epithelial carcinoma cell-line NCI H-1299  
267 was procured from ATCC (Middlesex, UK). BEAS-2B was cultured in BEGM media  
268 supplemented with bullet kit from Lonza, THP-1 and H-1299 cells were maintained in RPMI  
269 1640 supplemented with 10% FCS. HUVECs were isolated from human umbilical cord and were  
270 cultured in M199 media supplemented with ECGF (Sigma, USA). Experiments with Human  
271 umbilical cords were performed as per guidelines and protocols approved by the Institutional  
272 Human Ethics Committee.

273 **Animals**

274 Male BALB/c mice (8-10 weeks old) were obtained from National Institute of Nutrition  
275 (Hyderabad, India) and acclimatized for a week prior to the experiments. All animals were  
276 maintained as per guidelines and protocols approved by the Institutional Animal Ethics  
277 Committee.

278 **Antibodies**

279 CD-63, Alix, Tsg-101, Hsp-70,  $\beta$ -actin and GAPDH were purchased from SantaCruz  
280 Biotechnology (Santa Cruz, CA). Fluorescently labeled Annexin-V, CD-81 (FITC), CD-63  
281 (FITC), CD-63 (PE) and CD-9 (FITC) were purchased from BD biosciences (San Jose, CA).

282 **Development of OVA-sensitized Mouse Model of asthma and treatment of mice with**  
283 **simvastatin**

284 Mice were sensitized and challenged as described earlier <sup>28</sup> (**Figure S5 in the online**  
285 **supplement**). Mice were divided into four groups as indicated, each group (n=6) was named  
286 according to sensitization/challenge/treatment: SHAM/PBS/VEH (normal controls, VEH-  
287 vehicle) called ‘SHAM’, OVA/OVA/VEH (allergic controls, OVA, chicken egg ovalbumin,  
288 Grade V, Sigma, USA) called ‘OVA’, OVA/OVA/Simvastatin (allergic mice treated with 40  
289 mg/kg/dose Simvastatin, Sigma, USA) called ‘Statin’ and OVA/OVA/Simvastatin + Mevalonate  
290 (allergic mice treated with 40 mg/kg/dose Simvastatin and 20 mg/kg/dose mevalonate Sigma,  
291 USA) called ‘Mevalonate’ respectively.

## 292 **Exosome Isolation**

293 Exosomes were isolated using a series of centrifugation and ultracentrifugation techniques as  
294 described elsewhere <sup>26</sup> with the modification wherein the supernatant from 10,000g fraction was  
295 filtered with a 0.2µm membrane before subjecting it to ultracentrifugation at 100,000g for 2  
296 hours. The pellet was then washed with a large amount of PBS and then resuspended in 200µl of  
297 PBS, which was then sucrose density gradient purified. The exosome pellet was suspended in  
298 lamelli buffer when used for western blotting.

## 299 **Semi-quantitative detection of exosomes by bead-based assay**

300 For semi-quantitative detection of exosomes, antibody coated beads were used as described  
301 earlier. <sup>14</sup> Briefly, 20,000 anti-CD-63 antibody coated beads were washed in 2% BSA and then  
302 incubated with 10,000g supernatant of BALF or culture supernatant overnight. Next day, the  
303 bead bound exosomes were detected using surface proteins for exosomes or phosphatidylserine  
304 on their surface, using flow cytometer.

305

306 **Flow cytometry**

307 For surface labeling, cells were incubated with the antibodies diluted 1:25 in staining buffer for  
308 30 minutes on ice, followed by a PBS wash, after which the cells were fixed with 2%  
309 paraformaldehyde. For intracellular labeling, cells were fixed and permeabilized, followed by  
310 staining. For total (surface+intracellular) CD-63 staining, initially the surface labeling was  
311 carried out as mentioned above. After the antibody incubation, cells were fixed and  
312 permeabilized and then the protocol for intracellular labeling was carried out.

313 **Western blot**

314 Total cell protein was extracted and was resolved onto a polyacrylamide gel, which was then  
315 transferred onto a nitrocellulose membrane. The membrane was blocked with 5% skimmed milk  
316 and then probed for proteins of interest.

317 **Measurement of Airway hyper-responsiveness (AHR)**

318 AHR in the form of airway resistance was estimated in anesthetized mice using the FlexiVent  
319 system (Scireq, Canada) which uses a computer-controlled mouse ventilator and integrates with  
320 respiratory mechanics as described previously.<sup>25</sup> Final results were expressed as airway  
321 resistance with increasing concentrations of methacholine.

322 **Lung Histology**

323 Formalin-fixed, paraffin-embedded lung tissue sections were examined for airway inflammation,  
324 goblet cell metaplasia and sub-epithelial fibrosis with Hematoxylin & Eosin (H&E), Periodic  
325 acid-Schiff (PAS) and Masson-Trichrome (MT) staining respectively as described previously.<sup>28</sup>  
326 Briefly, grades of zero to four were given for no inflammation (zero), occasional cuffing with

Kulshreshtha et al

---

327 inflammatory cells (one), when most bronchi or vessels were surrounded by a thin layer (1–2  
328 cells) (two), a moderate layer (3–5 cells) (three), and a thick layer (more than 5 cells deep) (four)  
329 of inflammatory cells and an increment of 0.5 was given if the inflammation fell between two  
330 grades and total inflammation score was calculated by addition of both peribronchial and  
331 perivascular inflammation scores.

### 332 **Measurements of cytokines in lung homogenate**

333 Lung homogenates were used for ELISA of IL-4, IL-5, IFN- $\gamma$ , IL-10 (BD Pharmingen, San  
334 Diego, CA) and IL-13 (R&D systems, Minneapolis, MN) as per the manufacturer's protocol.  
335 Results were expressed in picograms and normalized by protein concentrations.

### 336 **Immunohistochemistry**

337 Paraffin embedded tissue sections were used for preparation of 5 $\mu$ m tissue slides and  
338 immunohistochemistry was performed as described in.<sup>10</sup> CD-63 antibody was used at a dilution  
339 of 1:100.

### 340 **Immunofluorescence**

341 Cells were seeded onto 0.17mm coverslips and immunofluorescence was performed as  
342 described,<sup>28</sup> CD-63 (FITC-conjugated) was used at a dilution of 1:250.

343 For exosome uptake assay by HUVECs, exosomes isolated from THP-1 cells were labeled with  
344 DiO-C16 for 1 hour and then unlabeled dye was removed by washing with PBS. Purified labeled  
345 exosomes were isolated by floating DIO labeled exosomes on sucrose density gradient. THP-1  
346 exosomes thus isolated were resuspended in M-199 medium and incubated with cultured



Kulshreshtha et al

---

347 HUVEC cells. After incubation for 4 hours, HUVEC cells were washed, fixed, and observed  
348 under confocal microscopy.

### 349 **Quantitative polymerase chain reaction protocol**

350 Real Time PCR for microRNAs were performed with sybr-green using custom primers. Equal  
351 concentration of starting RNA was used from each treatment for measuring micro-RNA in  
352 supernatant, while micro-RNA in cells were normalized to 18s rRNA as internal control. Primer  
353 sequences used were mir-150 RT primer 5'-  
354 CTCAACTGGTGTCGTGGAGTCGGCAATTCAGTTGAGCACTGGTA-3', mir-150 forward  
355 primer, 5'-ACACTCCAGCTGGGTCTCCCAACCCTTGTA-3', mir-16 RT primer 5'-  
356 CTCAACTGGTGTCGTGGAGTCGGCAATTCAGTTGAGCGCCAATA-3', mir-16 forward  
357 primer, 5'-ACACTCCAGCTGGGTAGCAGCACGTAAATA-3', mir-181 RT primer, 5'-  
358 CTCAACTGGTGTCGTGGAGTCGGCAATTCAGTTGAGACCCACCG-3', mir-181 forward  
359 primer 5'-ACACTCCAGCTGGGAACATTCATTGCTGTCG-3', universal reverse primer 5'-  
360 GTGTCGTGGAGTCGGCAATTC-3'.

### 361 **HUVECs transmigration assay**

362 The migration ability of HUVEC was tested in a Transwell Boyden Chamber (6.5 mm, Costar).  
363 The polycarbonate membranes (8  $\mu$ m pore size) on the bottom of the upper compartment of the  
364 Transwells were coated with 1% gelatin matrix. Cells were suspended in serum-free M-199  
365 culture medium at a concentration of  $4 \times 10^5$  cells/ml, treated with or without simvastatin treated  
366 THP-1 MVs for 2 hr and then added to the upper chamber ( $4 \times 10^4$  cells/well). Simultaneously,  
367 0.5 ml of M-199 with 10% FBS was added to the lower compartment, and the Transwell-  
368 containing plates were incubated for 4 hr in a 5% CO<sub>2</sub> atmosphere saturated with H<sub>2</sub>O. At the

Kulshreshtha et al

---

369 end of the incubation, cells that had entered the lower surface of the filter membrane were fixed  
370 with 90% ethanol for 15 min at room temperature, washed three times with distilled water, and  
371 stained with 0.1% crystal violet in 0.1 M borate and 2% ethanol for 15 min at room temperature.  
372 Cells remaining on the upper surface of the filter membrane (nonmigrant) were scraped off  
373 gently with a cotton swab. Images of migrant cells were captured by a photomicroscope. Cell  
374 migration was quantified by blind counting of the migrated cells on the lower surface of the  
375 membrane, with five fields per chamber.

### 376 **Statistical analysis**

377 Data are expressed as mean  $\pm$  standard error (SE). Significance of differences between groups  
378 was estimated using unpaired Student t-test for two groups or ANOVA with post hoc testing and  
379 Bonferroni correction for multiple group comparisons. Statistical significance was set at  $p \leq$   
380 0.05.

### 381 **ACKNOWLEDGEMENTS**

382 Authors (AK, KK) acknowledge the help of CSIR for their fellowships. This work is supported  
383 by grants from Council of Scientific and Industrial Research (CSIR), India (Task Force Project  
384 BSC0116, MLP5502), Department of Science & Technology (GAP84) and DST-INSPIRE grant  
385 to AK. We also acknowledge St. Stephen's Hospital, New Delhi for providing Human Umbilical  
386 Cords for HUVEC isolation.

387

### 388 **Author contributions**

389 AK and BG conceptualized and established the hypotheses. AK designed the study, executed the  
390 experiments, performed data acquisition, analysis and interpretation, drafted the manuscript,

Kulshreshtha et al

---

391 critically revised the manuscript and performed statistical analysis; SS and KK was involved in  
392 the study design, experiments and co-analysis of data; assisted critical revision of the manuscript  
393 and provided technical support; AA and BG were involved in conception and design of the  
394 study, interpretation of data, drafting of the manuscript, critical revision of the manuscript for  
395 important intellectual content, obtaining funding and supervision.

396

### 397 **Additional information**

398 Author(s) declare no Competing financial interests.

399

### 400 **References**

- 401 1. Théry, C., Ostrowski, M. & Segura, E. Membrane vesicles as conveyors of immune  
402 responses. *Nature Reviews Immunology* (2009). doi:10.1038/nri2567
- 403 2. Choi, D. S., Kim, D. K., Kim, Y. K. & Gho, Y. S. Proteomics, transcriptomics and  
404 lipidomics of exosomes and ectosomes. *Proteomics* (2013). doi:10.1002/pmic.201200329
- 405 3. Valadi, H. *et al.* Exosome-mediated transfer of mRNAs and microRNAs is a novel  
406 mechanism of genetic exchange between cells. *Nat. Cell Biol.* (2007).  
407 doi:10.1038/ncb1596
- 408 4. Belting, M. & Wittrup, A. Nanotubes, exosomes, and nucleic acid-binding peptides  
409 provide novel mechanisms of intercellular communication in eukaryotic cells:  
410 Implications in health and disease. *Journal of Cell Biology* (2008).  
411 doi:10.1083/jcb.200810038
- 412 5. Lai, R. C., Yeo, R. W. Y., Tan, K. H. & Lim, S. K. Mesenchymal stem cell exosome  
413 ameliorates reperfusion injury through proteomic complementation. *Regenerative*  
414 *Medicine* (2013). doi:10.2217/rme.13.4
- 415 6. Christianson, H. C., Svensson, K. J., van Kuppevelt, T. H., Li, J.-P. & Belting, M. Cancer  
416 cell exosomes depend on cell-surface heparan sulfate proteoglycans for their  
417 internalization and functional activity. *Proc. Natl. Acad. Sci.* (2013).  
418 doi:10.1073/pnas.1304266110

- 
- 419 7. Meckes, D. G. *et al.* Human tumor virus utilizes exosomes for intercellular  
420 communication. *Proc. Natl. Acad. Sci.* (2010). doi:10.1073/pnas.1014194107
- 421 8. Admyre, C. *et al.* B cell-derived exosomes can present allergen peptides and activate  
422 allergen-specific T cells to proliferate and produce TH2-like cytokines. *J. Allergy Clin.*  
423 *Immunol.* (2007). doi:10.1016/j.jaci.2007.06.040
- 424 9. Cianciaruso, C. *et al.* Primary human and rat  $\beta$ -Cells release the intracellular autoantigens  
425 GAD65, IA-2, and proinsulin in exosomes together with cytokine-induced enhancers of  
426 immunity. *Diabetes* (2017). doi:10.2337/db16-0671
- 427 10. Kulshreshtha, A., Ahmad, T., Agrawal, A. & Ghosh, B. Proinflammatory role of epithelial  
428 cell-derived exosomes in allergic airway inflammation. *J Allergy Clin Immunol* (2013).  
429 doi:S0091-6749(12)03565-8 [pii]10.1016/j.jaci.2012.12.1565
- 430 11. Bobrie, A. *et al.* Rab27a supports exosome-dependent and -independent mechanisms that  
431 modify the tumor microenvironment and can promote tumor progression. *Cancer Res.*  
432 (2012). doi:10.1158/0008-5472.CAN-12-0925
- 433 12. Ju, R. *et al.* Angiopoietin-2 secretion by endothelial cell exosomes: Regulation by the  
434 phosphatidylinositol 3-kinase (PI3K)/Akt/endothelial nitric oxide synthase (eNOS) and  
435 syndecan-4/syntenin pathways. *J. Biol. Chem.* (2014). doi:10.1074/jbc.M113.506899
- 436 13. Baietti, M. F. *et al.* Syndecan-syntenin-ALIX regulates the biogenesis of exosomes. *Nat.*  
437 *Cell Biol.* (2012). doi:10.1038/ncb2502
- 438 14. Ostrowski, M. *et al.* Rab27a and Rab27b control different steps of the exosome secretion  
439 pathway. *Nat. Cell Biol.* (2010). doi:10.1038/ncb2000
- 440 15. Savina, A., Furlán, M., Vidal, M. & Colombo, M. I. Exosome release is regulated by a  
441 calcium-dependent mechanism in K562 cells. *J. Biol. Chem.* (2003).  
442 doi:10.1074/jbc.M301642200
- 443 16. Trajkovic, K. *et al.* Ceramide triggers budding of exosome vesicles into multivesicular  
444 endosomes. *Science* (80-. ). (2008). doi:10.1126/science.1153124
- 445 17. Patel, T. N., Shishehbor, M. H. & Bhatt, D. L. A review of high-dose statin therapy:  
446 Targeting cholesterol and inflammation in atherosclerosis. *European Heart Journal*  
447 (2007). doi:10.1093/eurheartj/ehl445
- 448 18. Linetti, A. *et al.* Cholesterol reduction impairs exocytosis of synaptic vesicles. *J. Cell Sci.*  
449 (2010). doi:10.1242/jcs.060681
- 450 19. Ziviani, L. *et al.* The effects of lacidipine on the steady/state plasma concentrations of  
451 simvastatin in healthy subjects. *Br. J. Clin. Pharmacol.* (2001). doi:10.1046/j.1365-  
452 2125.2001.051002147.x
- 453 20. Yuan, C. *et al.* Statins as potential therapeutic drug for asthma? *Respiratory Research*  
454 (2012). doi:10.1186/1465-9921-13-108

- 455 21. Zeki, A. A. *et al.* Statin use and asthma control in patients with severe asthma. *BMJ Open*  
456 (2013). doi:10.1136/bmjopen-2013-003314
- 457 22. Ahmad, T. *et al.* Simvastatin improves epithelial dysfunction and airway  
458 hyperresponsiveness: From asymmetric dimethyl-arginine to asthma. *Am. J. Respir. Cell*  
459 *Mol. Biol.* (2011). doi:10.1165/rcmb.2010-0041OC
- 460 23. Zeki, A. A., Franzi, L., Last, J. & Kenyon, N. J. Simvastatin inhibits airway  
461 hyperreactivity: Implications for the mevalonate pathway and beyond. *Am. J. Respir. Crit.*  
462 *Care Med.* (2009). doi:10.1164/rccm.200901-0018OC
- 463 24. Zhang, Y. *et al.* Secreted Monocytic miR-150 Enhances Targeted Endothelial Cell  
464 Migration. *Mol. Cell* (2010). doi:10.1016/j.molcel.2010.06.010
- 465 25. Schuh, M. An actin-dependent mechanism for long-range vesicle transport. *Nat. Cell Biol.*  
466 (2011). doi:10.1038/ncb2353
- 467 26. Tse, S. M. *et al.* Statin exposure is associated with decreased asthma-related emergency  
468 department visits and oral corticosteroid use. *Am. J. Respir. Crit. Care Med.* (2013).  
469 doi:10.1164/rccm.201306-1017OC
- 470 27. Peinado, H. *et al.* Melanoma exosomes educate bone marrow progenitor cells toward a  
471 pro-metastatic phenotype through MET. *Nat. Med.* (2012). doi:10.1038/nm.2753
- 472 28. Kumar, M. *et al.* Let-7 microRNA-mediated regulation of IL-13 and allergic airway  
473 inflammation. *J. Allergy Clin. Immunol.* (2011). doi:10.1016/j.jaci.2011.04.034

474

475

## 476 **FIGURE LEGENDS**

477 **Figure 1. Simvastatin reduces exosomes secretion. (A-B)**, Cells at a concentration of  $2 \times 10^6$ /  
478 well of a 6-well plate were treated with indicated concentrations of simvastatin in 2 ml of media  
479 for a period of 24 hours, after which the culture supernatant was harvested and 1ml from it was  
480 used for measuring exosomes. Secreted exosome levels in culture supernatant from simvastatin  
481 treated epithelial cells **(A)** and THP-1 monocytes **(B)**, measured as in **Figure S4 in the online**  
482 **supplement. (C)**, Levels of exosome associated Alix, Tsg-101 and  $\beta$ -actin in pelleted exosome  
483 fraction from supernatant of  $10^7$  simvastatin treated cells. **(D)** Effect of simvastatin treatment on  
484 exosome associated CD9/CD81 and Annexin V in cell culture supernatant from IL13 (25 ng/ml)

Kulshreshtha et al

485 and simvastatin treated epithelial cells. Data in **A**, **B** and **D** represent the mean±SE from three  
486 independent experiments. Data in **C** is representative image from one of the two independent  
487 experiments. (\*p<0.05 vs Control and †p<.05 vs rIL13). Sim: Simvastatin.

488  
489 **Figure 2. Simvastatin directly alters the level of various exosome associated proteins. (A)**  
490 Western blots for Alix and CD63 levels in total cell protein with different doses of simvastatin.  
491 **(B)** Cell surface levels of CD63 and CD81 were measured by flow cytometry after treatment  
492 with various doses of simvastatin, E-cadherin was used as control surface marker. **(C)**  
493 Immunocytochemistry for CD63 on cells treated with indicated concentration of simvastatin.  
494 Sim: Simvastatin.

495  
496 **Figure 3. Effect of simvastatin and mevalonate cotreatment on inflammatory parameters.**  
497 **(A)** Secreted exosome levels in BAL supernatant of mice from indicated groups. **(B-C)** Lung  
498 sections stained with hematoxylin and eosin **(H&E, B)** showing leukocyte infiltration, periodic  
499 acid–Schiff **(PAS, C)** for collagen deposition. **(D)** Airway resistance with increasing  
500 concentrations of methacholine 12h after the last challenge. **(E-F)** Effect of indicated treatments  
501 on total leukocyte count **(E)** and differential leukocyte count enumerated by morphological  
502 criteria **(F)**. **(G)** Ova specific serum IgE levels measured by ELISA. **(H)** Cytokines IL-13 and IL-  
503 4 measured in pulmonary homogenate. Stains in **(B, C)** shown at 20X magnification. **Br**,  
504 Bronchus. Results **(A, D, E, F, G, H)** are the mean ± SE for each group from two experiments  
505 with 4-6 mice in each group, (\*, p<0.05 vs SHAM and †p<0.05 vs OVA.), Sim: Simvastatin (40  
506 µmg/kg/dose), Mev: Mevalonate (20 mg/kg/dose).

Kulshreshtha et al

507 **Figure 4. Simvastatin reduces exosome production from monocytes and attenuates**  
508 **exosome-enclosed mir-150 mediated endothelial cell migration.**  $1 \times 10^6$  of THP-1 cells were  
509 seeded and treated with  $0.3 \mu\text{M}$  of simvastatin and  $2 \mu\text{M}$  GW4869 for a period of 24 hours. Cell  
510 pellet and supernatant was harvested and used separately for RNA isolation. Presence of  
511 indicated micro-RNAs was determined using qRT-PCR. Simvastatin mediated reduction of  
512 exosomes secretion from THP-1 monocytes results in lower levels of secretory miRNAs **(A)** but  
513 not intracellular miRNAs **(B)**. **(C)** Uptake of DIO-labeled THP-1 derived exosomes ( $10 \mu\text{g}/\text{mL}$ )  
514 by HUVECs. **(D)** Relative mir-150 levels in HUVECs with indicated treatment **(E)**, Simvastatin  
515 mediated reduction in exosome secretion by THP-1 monocytes results in lower mir-150 levels in  
516 HUVECs incubated with exosomes from simvastatin treated THP-1 in comparison to exosomes  
517 from same number of untreated THP-1 control cells, and consequent reduction in migration of  
518 endothelial cells. (\* $p < 0.05$  vs Control in **A**, **D** and **E2**.  $\forall p < 0.05$  vs Ctrl+MV in **D** and **E2**). Sim:  
519 Simvastatin, **Control:** Control HUVEC.

520

521 **Figure 5. Simvastatin alters localization of CD63-positive compartments in cells.**  
522 Representative Immunohistochemistry images for CD63 from lung tissue sections of OVA and  
523 OVA/Simvastatin treated mice in **(A)** epithelial cells and macrophages **(B)**. **(C)**, Representative  
524 confocal images of CD-63 levels and localization post treatment with simvastatin. Arrows  
525 indicates CD63 localization pattern. **(D)** Representative images showing CD63-EGFP  
526 distribution and its association with linear beeline like structures **(D1-D2, inset)** in control and  
527 simvastatin treated cells in subplasmalemmal region, detected by TIRF microscopy and  
528 quantification of relative length **(D3)**. **(E)** Co-localization of CD63 with actin nucleation sites as  
529 visualized by confocal microscopy. **(F)** Localization of CD63 with actin in absence and presence

Kulshreshtha et al

---

530 of actin polymerization enhancer Jasplakinolide (100 nM). Images in **(E, F)** shown at 63X while  
531 **(A, B, C, D)** shown at 100 X magnification. (\* $p < 0.05$  vs Control in **Figure D3**). Sim:  
532 Simvastatin.



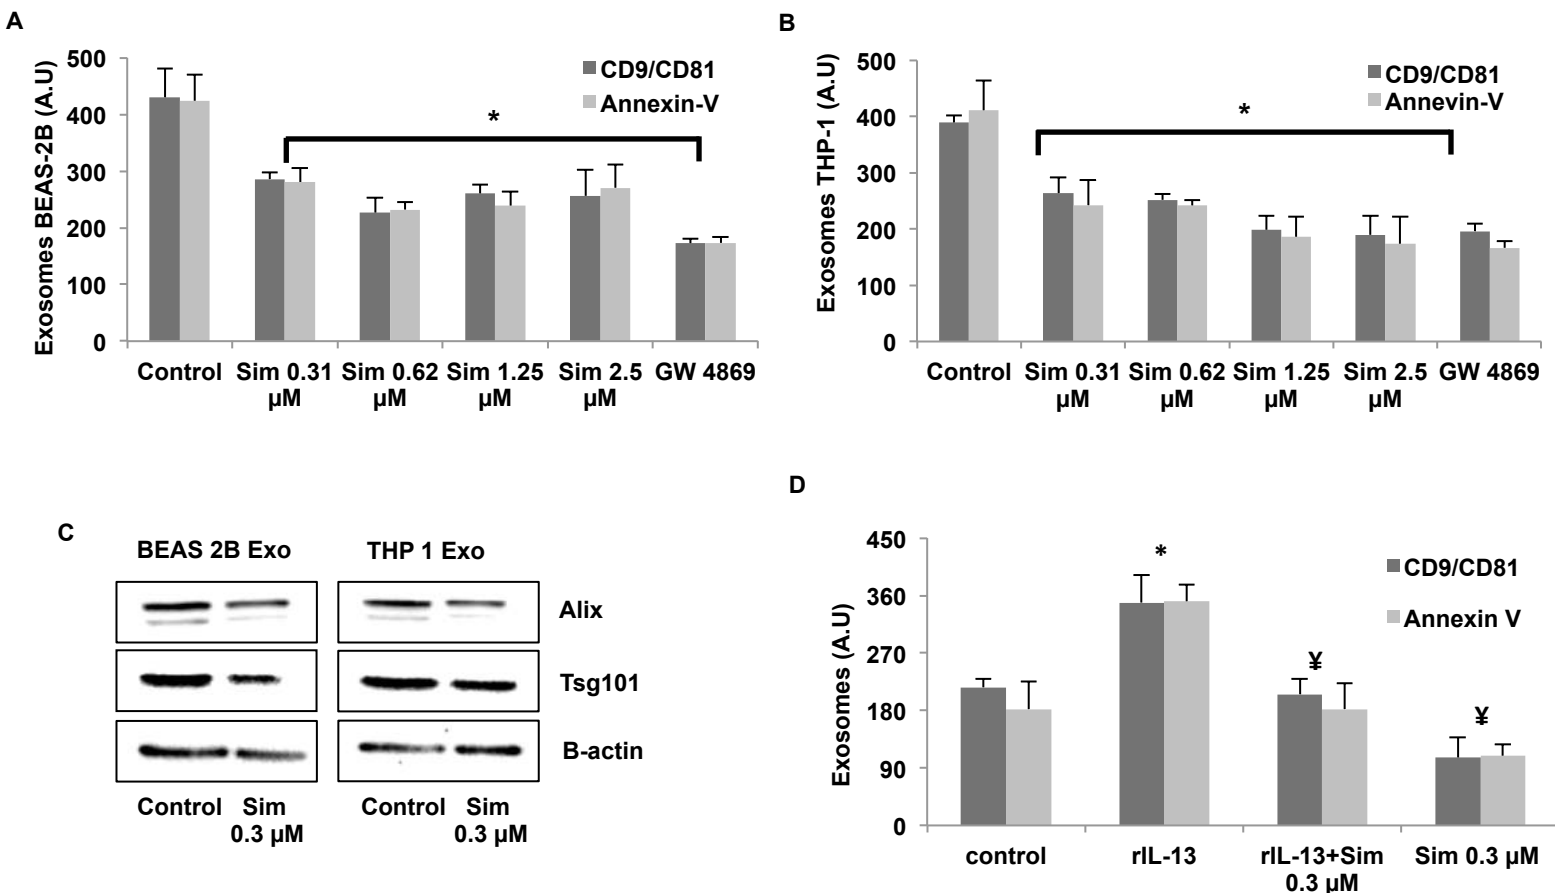

**Figure 1. Simvastatin reduces exosomes secretion.** (A-B), Cells at concentration of  $1 \times 10^6$ / ml were treated with indicated concentrations of simvastatin in 2 ml of media for a period of 24 hours, after which the culture supernatant was harvested and 1ml from it was used for measuring exosomes. Secreted exosome levels in culture supernatant from simvastatin treated epithelial cells (A) and THP-1 monocytes (B), measured as in **Figure E1, A in the online repository**. (C), Levels of exosome associated Alix, Tsg-101 and  $\beta$ -actin in pelleted exosome fraction from supernatant of  $10 \times 10^6$  simvastatin treated cells. (D) Effect of simvastatin treatment on exosome associated CD9/CD81 and Annexin V in cell culture supernatant from IL13 (25 ng/ml) and simvastatin treated epithelial cells. Data in A, B and D represent the mean  $\pm$  SE from three independent experiments. Data in C is representative image from one of the two independent experiments. ( $p < 0.05$  vs Control and  $\text{¥} p < .05$  vs rIL13). Sim: Simvastatin.

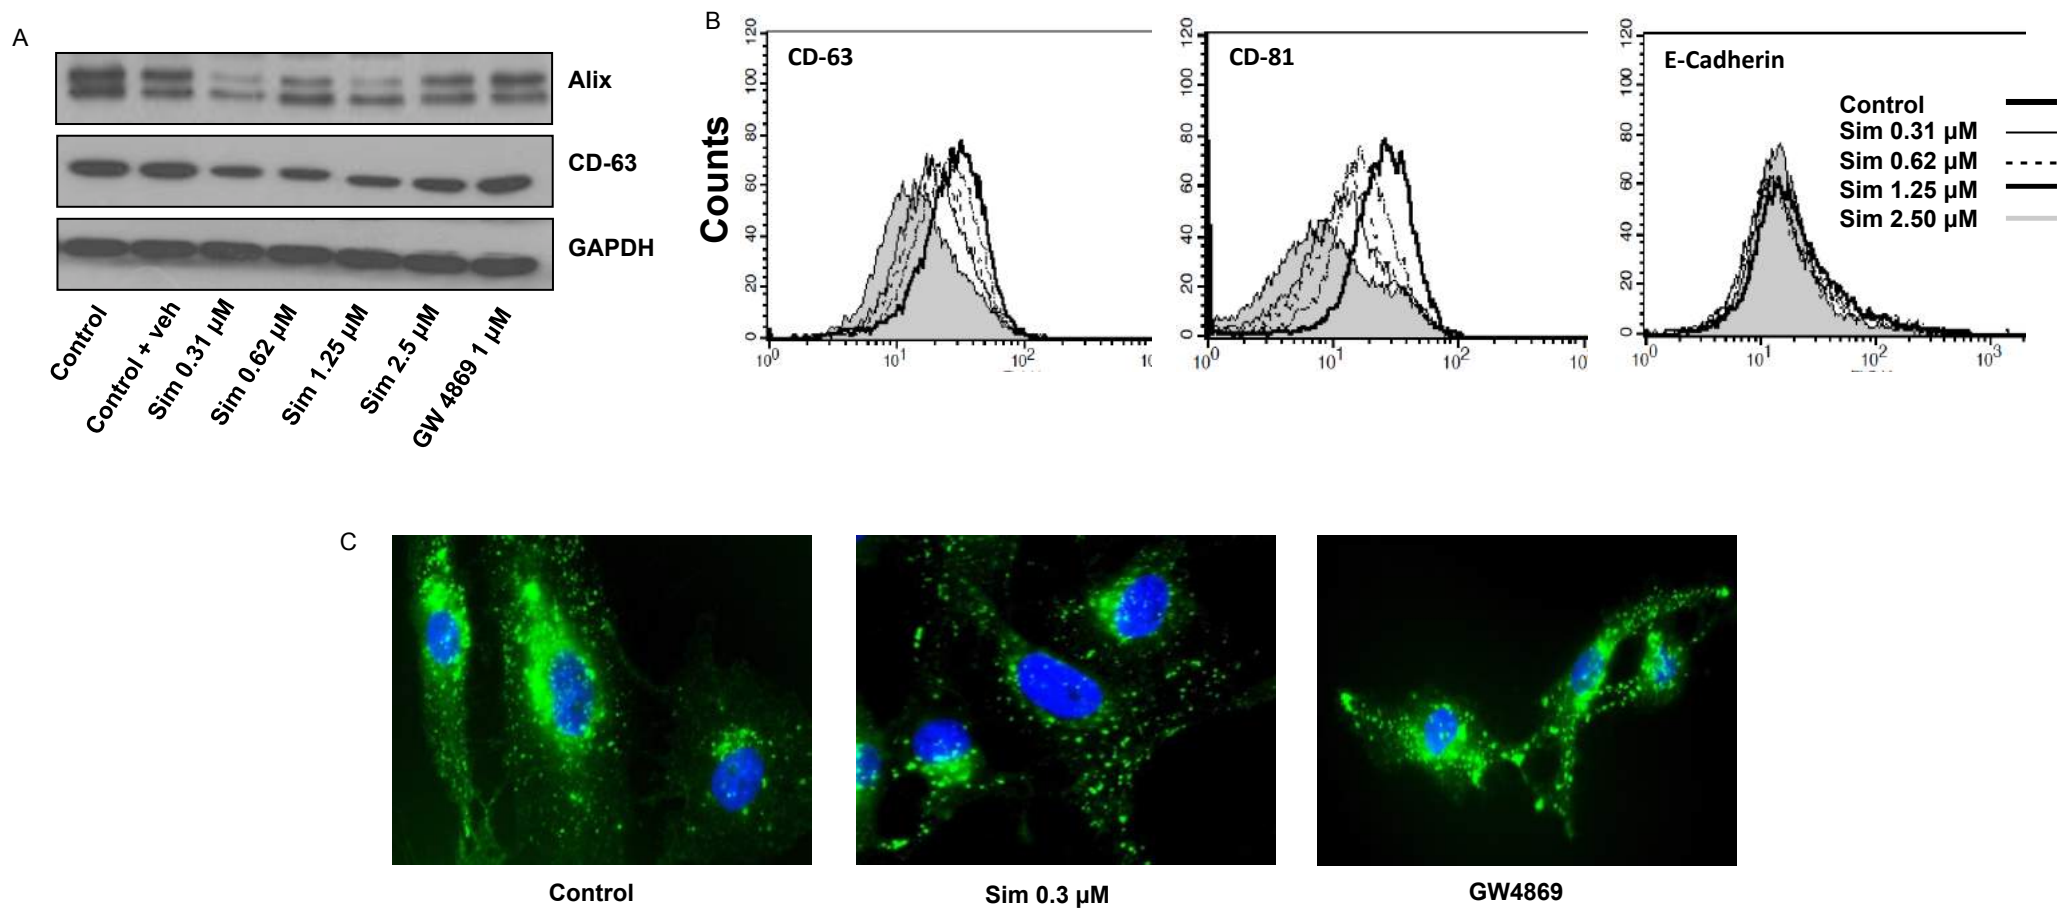

**Figure 2. Simvastatin directly alters the level of various exosome associated proteins. (A)** Western blots for Alix and CD63 levels in total cell protein with different doses of simvastatin. **(B)** Cell surface levels of CD63 and CD81 were measured by flow cytometry after treatment with various doses of simvastatin, E-cadherin was used as control surface marker. **(C)** Immunocytochemistry for CD63 on cells treated with indicated concentration of simvastatin. Sim: Simvastatin.

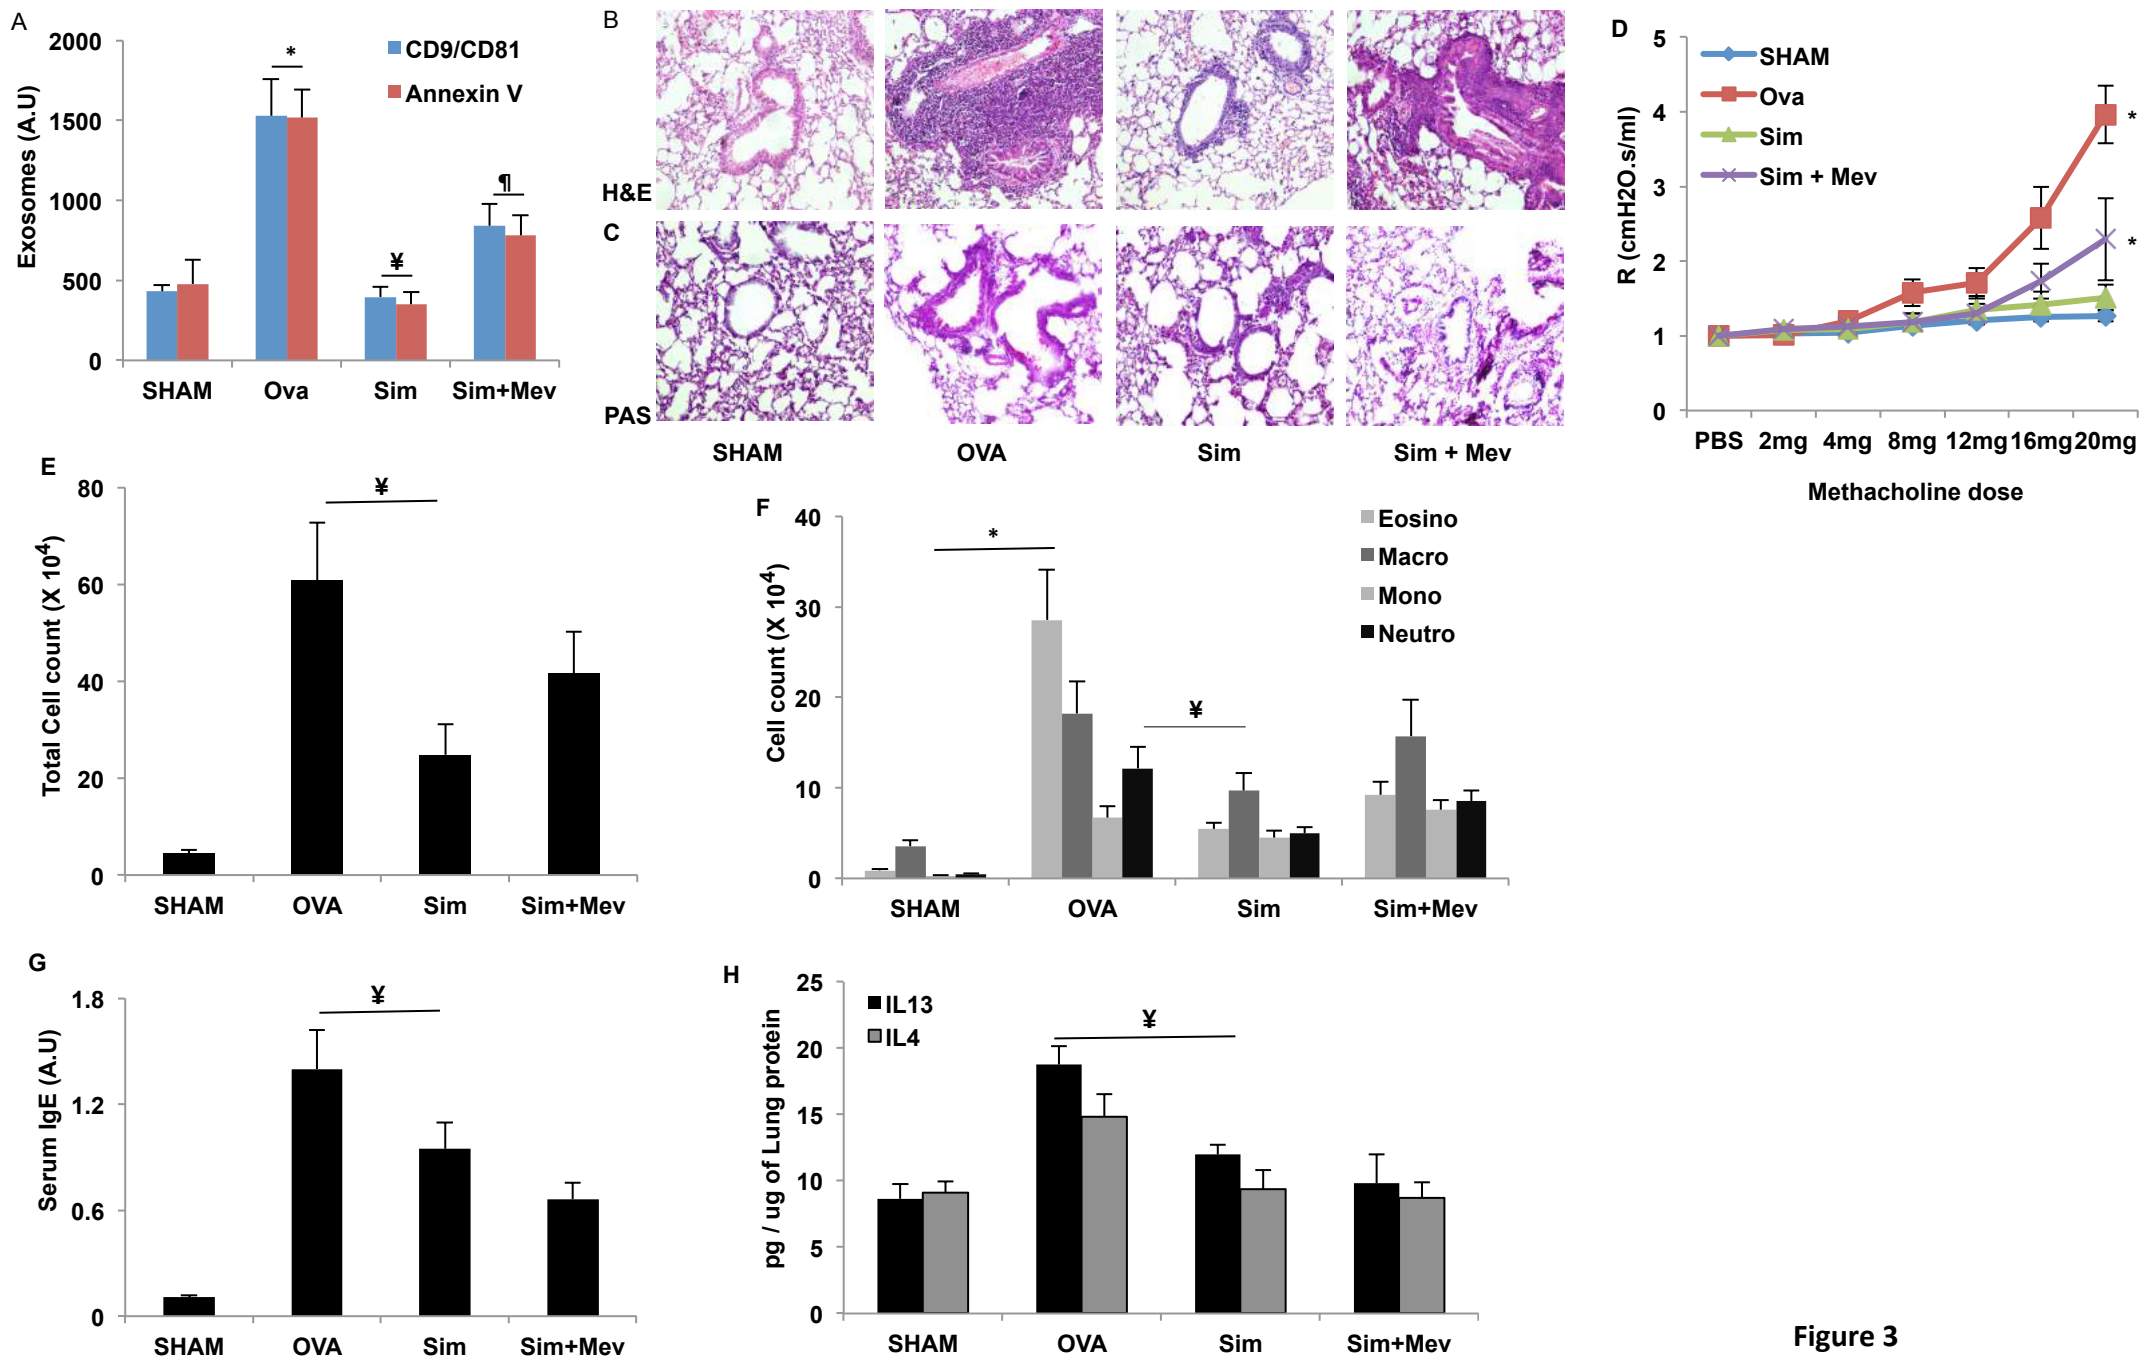

Figure 3

**Figure 3. Effect of simvastatin and mevalonate cotreatment on inflammatory parameters.** (A) Secreted exosome levels in BAL supernatant of mice from indicated groups. (B-C) Lung sections stained with hematoxylin and eosin (H&E, B) showing leukocyte infiltration, periodic acid–Schiff (PAS, C) for collagen deposition. (D) Airway resistance with increasing concentrations of methacholine 12h after the last challenge. (E-F) Effect of indicated treatments on total leukocyte count (E) and differential leukocyte count enumerated by morphological criteria (F). (G) Ova specific serum IgE levels measured by ELISA. (H) Cytokines IL-13 and IL-4 measured in pulmonary homogenate. Stains in (B, C) shown at 20X magnification. Br, Bronchus. Results (A, D, E, F, G, H) are the mean  $\pm$  SE for each group from two experiments with 4-6 mice in each group, (\*,  $p < 0.05$  vs SHAM and  $\yen$   $p < 0.05$  vs OVA.), Sim: Simvastatin (40 mg/kg/dose), Mev: Mevalonate (20 mg/kg/dose).

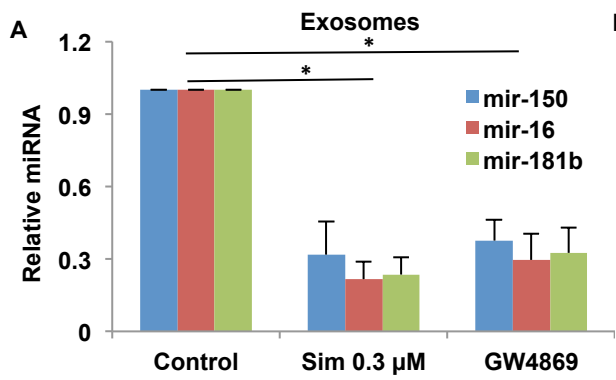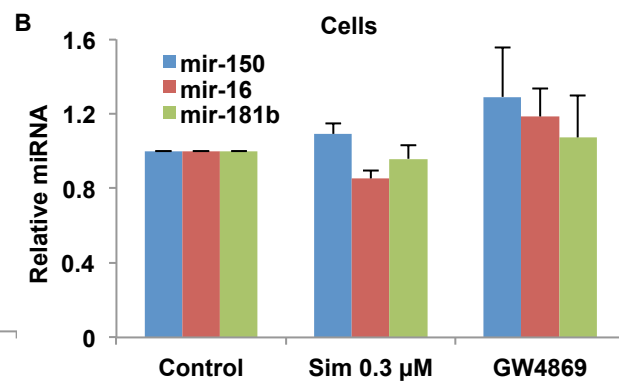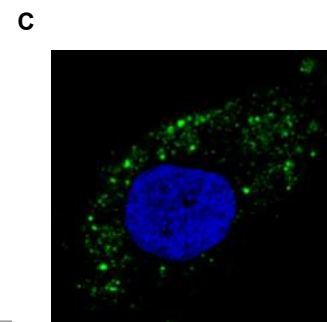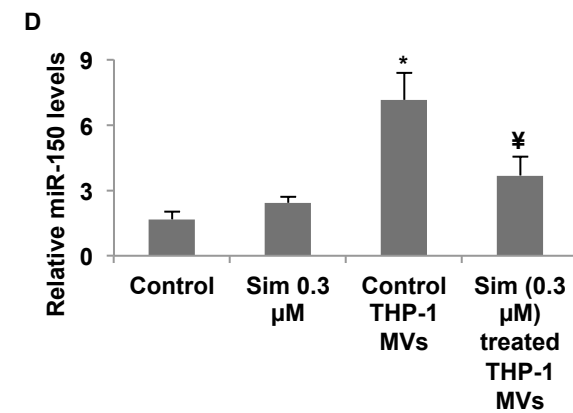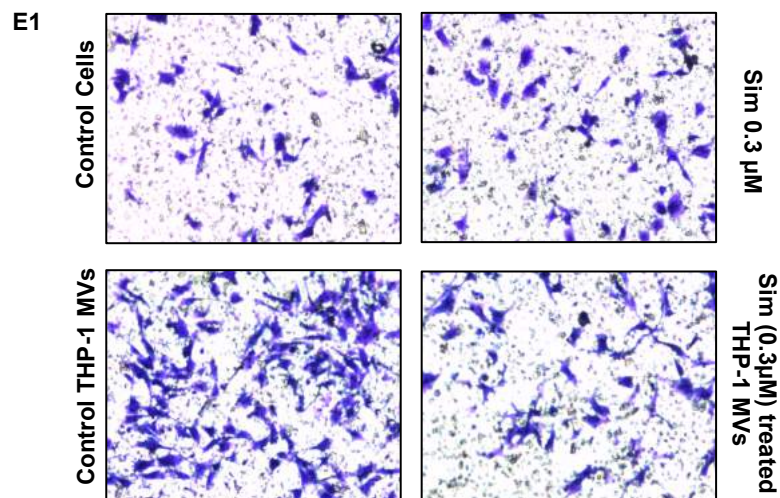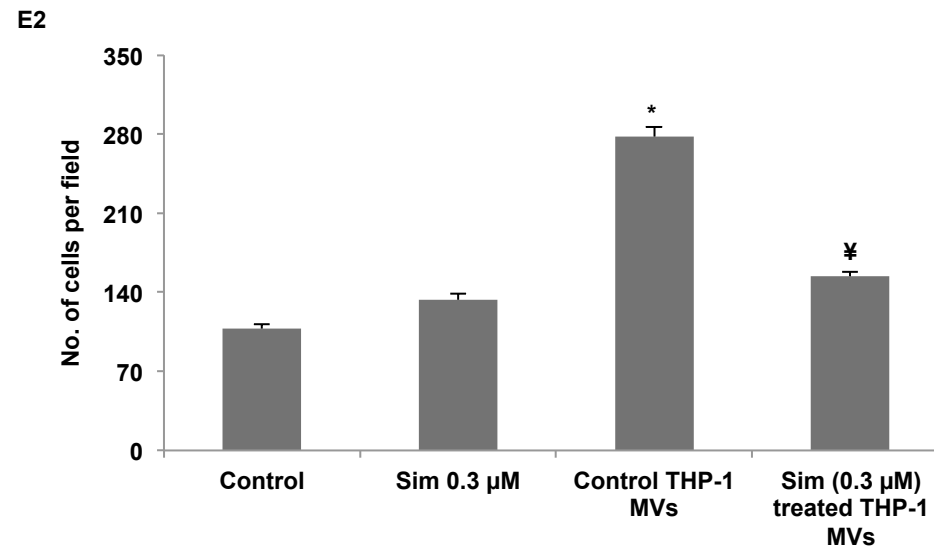

**Figure 4. Simvastatin reduces exosome production from monocytes and attenuates exosome-enclosed mir-150 mediated endothelial cell migration.** 1x10<sup>6</sup> of THP-1 cells were seeded and treated with 0.3µM of simvastatin and 2µM GW4869 for a period of 24 hours. Cell pellet and supernatant was harvested and used separately for RNA isolation. Presence of indicated micro-RNAs was determined using qRT-PCR. Simvastatin mediated reduction of exosomes secretion from THP-1 monocytes results in lower levels of secretory miRNAs **(A)** but not intracellular miRNAs **(B)**. **(C)** Uptake of DIO-labeled THP-1 derived exosomes (10 µg/mL) by HUVECs. **(D)** Relative mir-150 levels in HUVECs with indicated treatment **(E)**, Simvastatin mediated reduction in exosome secretion by THP-1 monocytes results in lower mir-150 levels in HUVECs incubated with exosomes from simvastatin treated THP-1 in comparison to exosomes from same number of untreated THP-1 control cells, and consequent reduction in migration of endothelial cells. (\*p<0.05 vs Control in **A, D** and **E2**. ¥ p<0.05 vs **Control THP-1 MVs in D and E2**). **Sim:** Simvastatin; **Control:** Control HUVEC



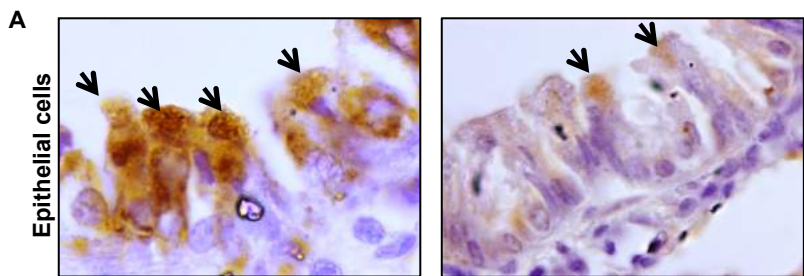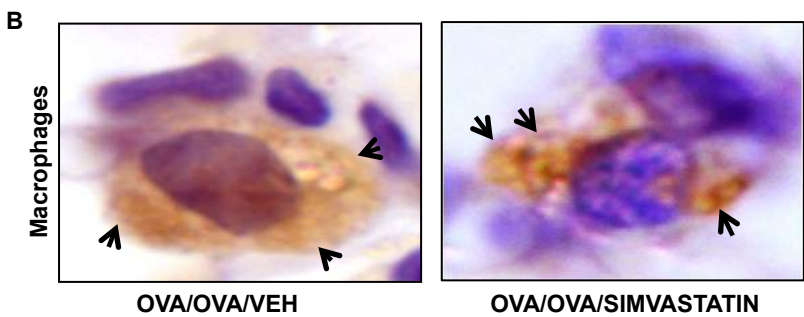

OVA/OVA/VEH

OVA/OVA/SIMVASTATIN

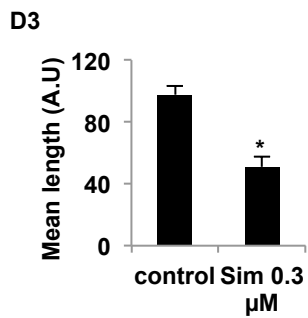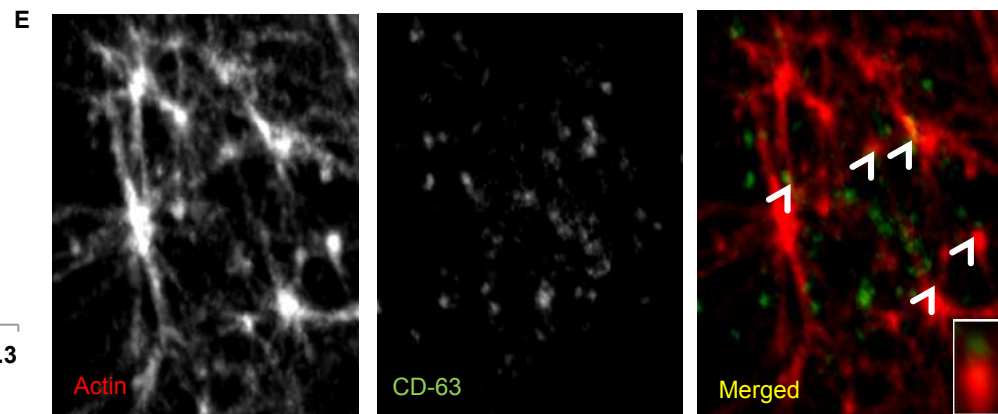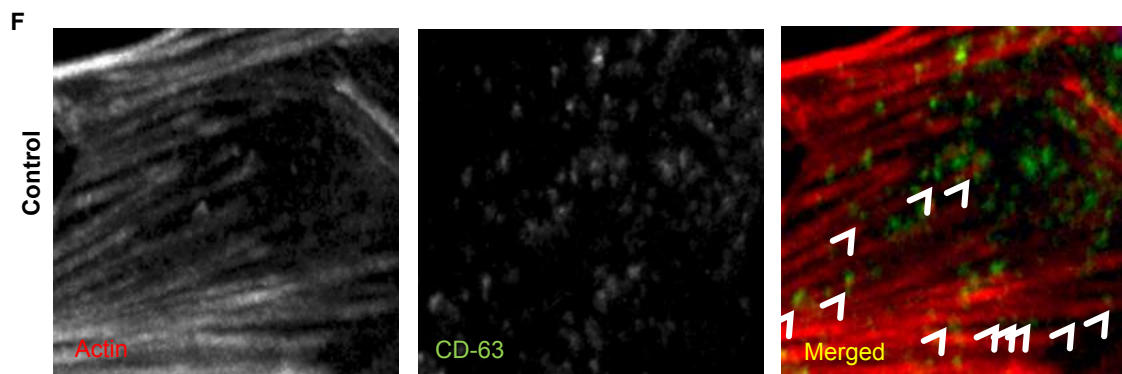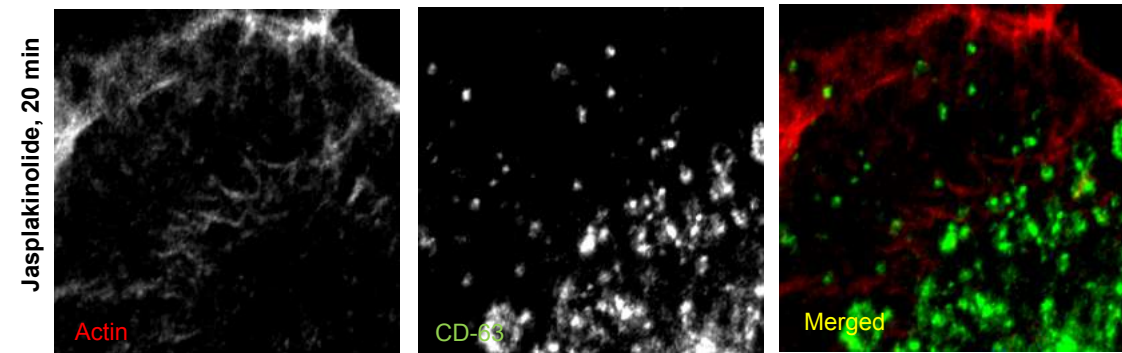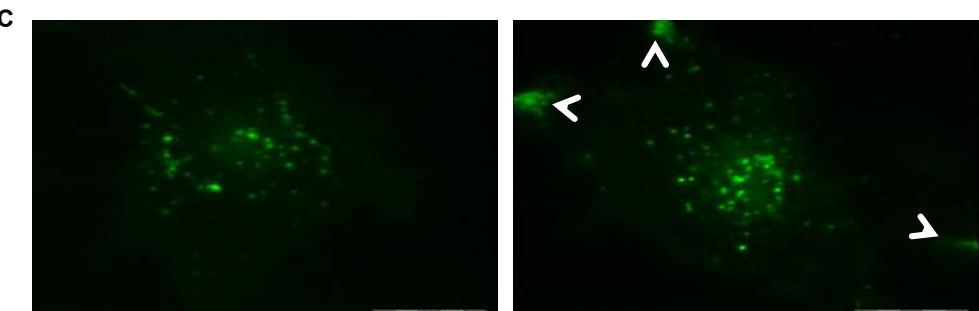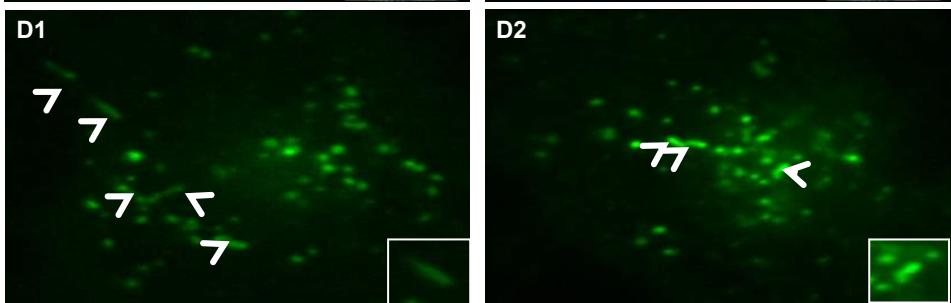

Control

Sim 0.3  $\mu$ M

**Figure 5. Simvastatin alters localization of CD63-positive compartments in cells.** Representative Immunohistochemistry images for CD63 from lung tissue sections of OVA and OVA/Simvastatin treated mice in **(A)** epithelial cells and macrophages **(B)**. **(C)**, Representative confocal images of CD-63 levels and localization post treatment with simvastatin. Arrows indicates CD63 localization pattern. **(D)** Representative images showing CD63-EGFP distribution and its association with linear beeline like structures **(D1-D2, inset)** in control and simvastatin treated cells in subplasmalemmal region, detected by TIRF microscopy and quantification of relative length **(D3)**. **(E)** Co-localization of CD63 with actin nucleation sites as visualized by confocal microscopy. **(F)** Localization of CD63 with actin in absence and presence of actin polymerization enhancer Jasplakinolide (100 nM). Images in **(E, F)** shown at 63X while **(A,B, C, D)** shown at 100 X magnification. (\* $p < 0.05$  vs Control in **Figure D3**). Sim: Simvastatin
